# Supplementary material for: Cost-effective eggshell-modified LDH composite for caffeine adsorption, cytotoxicity and antimicrobial activity: exploring the synergy and economic viability in search processes
Source: Royal Society of Chemistry journal article supplement (doi:10.1039/d4ra04558k), 2024-01-01
Supplement: d4ra04558k1.pdf [file d4ra04558k1.pdf]

## Cost-Effective Eggshell-Modified LDH Composite for Caffeine Adsorption, cytotoxicity and Antimicrobial Activity: Exploring the Synergy and Economic Viability in Search Processes

Asmaa Elrafey<sup>1</sup>, Ahmed A. Farghali<sup>2</sup>, W. Kamal<sup>3</sup>, Ahmed A. Allam<sup>4,5</sup>, Zienab E. Eldin<sup>2</sup>, Hassan A. Rudayni<sup>4</sup>, Haifa E. Alfassam<sup>6</sup>, Alaa A. A. Anwar<sup>3</sup>, Sara Saeed<sup>3</sup>, Rehab Mahmoud<sup>3\*</sup>

<sup>1</sup> Environmental Science and Industrial Development Department, Faculty of Postgraduate Studies for Advanced Sciences, Beni-Suef University, Beni-Suef, Egypt. [Asmaa\\_elrafey@hotmail.com](mailto:Asmaa_elrafey@hotmail.com)

<sup>2</sup> Materials Science and Nanotechnology Department, Faculty of Postgraduate Studies for Advanced Science (PSAS), Beni-Suef University, Beni-Suef 62511. [Ahmedfarghali74@yahoo.com](mailto:Ahmedfarghali74@yahoo.com), [t-zienabessam@zewailcity.edu.eg](mailto:t-zienabessam@zewailcity.edu.eg).

<sup>3</sup> Chemistry Department, Faculty of Science, Beni-Suef University, Beni-Suef 62511, Egypt. [rehabkhaled@science.bsu.edu.eg](mailto:rehabkhaled@science.bsu.edu.eg); [Sarasaeedabdelazeem@gmail.com](mailto:Sarasaeedabdelazeem@gmail.com), [Wesamkamal16@yahoo.com](mailto:Wesamkamal16@yahoo.com).

<sup>4</sup> Department of Biology, College of Science, Imam Muhammad Ibn Saud Islamic University, Riyadh 11623, Saudi Arabia [HARUDAYNI@imamu.edu.sa](mailto:HARUDAYNI@imamu.edu.sa)

<sup>5</sup> Department of Zoology, Faculty of Science, Beni-suef University, Beni-suef 65211 Egypt. [Ahmed.aliahmed@science.bsu.edu.eg](mailto:Ahmed.aliahmed@science.bsu.edu.eg)

<sup>6</sup> Department of Biology, college of Science, Princess Nourah bint Abdulrahman University, P.O. BOX 84428, Riyadh 11671, Saudi Arabia [halfassam@pnu.edu.sa](mailto:halfassam@pnu.edu.sa)

**Table S1.** Cost estimation details of the CaO prepared for eggshell

| Material       | Purchased quantity (g) | Total purchase cost (USD) | purchasing cost (USD/g) | Used quantity (g or mL) | cost of used quantity (USD) |
|----------------|------------------------|---------------------------|-------------------------|-------------------------|-----------------------------|
| eggshell waste | 25                     | 0                         | 0                       | 25                      | 0                           |
| washing water  | 10                     | 0.01                      | 0.001                   | 1                       | 0.001                       |
| Equipment      | Time (h)               | Max. power (kW)           | unit cost of power      | Energy cost (USD)       |                             |
| crushing       | 8                      | 1                         | 0.16                    | 1.28                    |                             |
| Drying         | 10                     | 1                         | 0.16                    | 1.6                     |                             |
| Calcination    | 2                      | 1                         | 0.16                    | 0.32                    |                             |
| total          |                        |                           |                         | 3.2                     | USD                         |
| yield          |                        |                           |                         | 25                      | g                           |
| cost           |                        |                           |                         | 0.13                    | USD/g                       |

**Table S2.** Cost estimation details of the LDH

| Material    | Purchased quantity (g) | Total purchase cost (USD) | purchasing cost (USD/g) | Used quantity (g or mL) | cost of used quantity (USD) |
|-------------|------------------------|---------------------------|-------------------------|-------------------------|-----------------------------|
| Zinc salt   | 500                    | 39.4                      | 7.576                   | 2                       | 15.152                      |
| Ferric salt | 500                    | 55.81                     | 2.4186                  | 3                       | 7.2558                      |
| NaOH        | 500                    | 17.55                     | 0.6                     | 4                       | 2.4                         |
|             |                        |                           |                         |                         |                             |
| Equipment   | Time (h)               | Max. power (kW)           | unit cost of power      | Energy cost (USD)       |                             |
| Hot plate   | 24                     | 1                         | 0.16                    | 3.84                    |                             |
| dry         | 24                     | 1                         | 0.16                    | 3.84                    |                             |
| centrifuge  | 0.5                    | 1                         | 0.16                    | 0.08                    |                             |
|             |                        |                           |                         |                         |                             |
| total       |                        |                           |                         | 32.5                    | USD                         |
| yield       |                        |                           |                         | 4                       | g                           |
| cost        |                        |                           |                         | 8.14                    | USD/g                       |

**Table S3** Cost estimation details of the composite

| Material    | Purchased quantity (g) | Total purchase cost (USD) | purchasing cost (USD/g) | Used quantity (g or mL) | cost of used quantity (USD) |
|-------------|------------------------|---------------------------|-------------------------|-------------------------|-----------------------------|
| CaO support | 1                      | 0.12804                   | 0.12804                 | 2                       | 0.25608                     |
| Zinc salt   | 500                    | 39.4                      | 7.576                   | 2                       | 15.152                      |
| Ferric salt | 500                    | 55.81                     | 2.4186                  | 3                       | 7.2558                      |
| NaOH        | 500                    | 17.55                     | 0.6                     | 4                       | 2.4                         |
| Equipment   | Time (h)               | Max. power (kW)           | unit cost of power      | Energy cost (USD)       |                             |
| Hot plate   | 24                     | 1                         | 0.16                    | 3.84                    |                             |
| dry         | 24                     | 1                         | 0.16                    | 3.84                    |                             |
| centrifuge  | 0.5                    | 1                         | 0.16                    | 0.08                    |                             |
| total       |                        |                           |                         | 32.8                    | USD                         |
| yield       |                        |                           |                         | 6                       | g                           |
| cost        |                        |                           |                         | 5.47                    | USD/g                       |
